# Supplementary material for: Four tetrazolate-based 3D frameworks with diverse subunits directed by inorganic anions and azido coligand: hydro/solvothermal syntheses, crystal structures, and magnetic properties
Source: Royal Society of Chemistry journal article supplement (doi:10.1039/c4dt03172e), 2014-11-25
Supplement: c4dt03172e1.pdf [file c4dt03172e1.pdf]

## Supporting Information

### Four tetrazolate-based 3D frameworks with diverse subunits directed by inorganic anions or azido coligand: hydrothermal syntheses, crystal structures, and magnetic behaviors

Zhao-Jun Hou,<sup>a</sup> Zhong-Yi Liu,<sup>a</sup> Ning Liu,<sup>a</sup> En-Cui Yang,<sup>a,\*</sup> and Xiao-Jun Zhao<sup>a,b,\*</sup>

<sup>a</sup> College of Chemistry, Key Laboratory of Inorganic-Organic Hybrid Functional Material Chemistry, Ministry of Education, Tianjin Key Laboratory of Structure and Performance for Functional Molecules, Tianjin Normal University, Tianjin 300387, P.R. China

<sup>b</sup> Collaborative Innovation Center of Chemical Science and Engineering (Tianjin), Tianjin 300071, China

**Table S1** Selected bond lengths /Å and angles /° for **1**<sup>a</sup>

|                                              |            |                                              |           |
|----------------------------------------------|------------|----------------------------------------------|-----------|
| Cu(1)–N(6)                                   | 1.991(3)   | Cu(1)–O(5)                                   | 2.056(2)  |
| Cu(1)–O(3)                                   | 2.252(2)   | Cu(2)–O(1)                                   | 1.968(2)  |
| Cu(2)–O(5)                                   | 2.004(2)   | Cu(2)–N(8) <sup>#2</sup>                     | 2.009(3)  |
| Cu(2)–N(4) <sup>#3</sup>                     | 2.013(3)   | Cu(2)–N(7) <sup>#1</sup>                     | 2.414(3)  |
| Cu(2)–N(2)                                   | 2.434(3)   | Cu(3)–N(1)                                   | 1.946(3)  |
| Cu(3)–N(5)                                   | 1.958(3)   | Cu(3)–O(2) <sup>#4</sup>                     | 1.991(2)  |
| Cu(3)–O(5)                                   | 2.028(2)   | Cu(3)–O(2)                                   | 2.256(2)  |
| N(6)–Cu(1)–O(5)                              | 88.01(10)  | N(6) <sup>#1</sup> –Cu(1)–O(5)               | 91.99(10) |
| N(6)–Cu(1)–O(5) <sup>#1</sup>                | 91.99(10)  | N(6) <sup>#1</sup> –Cu(1)–O(5) <sup>#1</sup> | 88.01(10) |
| N(6)–Cu(1)–O(3)                              | 89.69(10)  | N(6) <sup>#1</sup> –Cu(1)–O(3)               | 90.30(10) |
| O(5)–Cu(1)–O(3)                              | 85.94(8)   | O(5) <sup>#1</sup> –Cu(1)–O(3)               | 94.06(8)  |
| N(6)–Cu(1)–O(3) <sup>#1</sup>                | 90.31(10)  | N(6) <sup>#1</sup> –Cu(1)–O(3) <sup>#1</sup> | 89.70(10) |
| O(5)–Cu(1)–O(3) <sup>#1</sup>                | 94.06(8)   | O(5) <sup>#1</sup> –Cu(1)–O(3) <sup>#1</sup> | 85.94(8)  |
| O(1)–Cu(2)–O(5)                              | 92.24(9)   | O(1)–Cu(2)–N(8) <sup>#2</sup>                | 85.70(10) |
| O(5)–Cu(2)–N(4) <sup>#3</sup>                | 94.13(10)  | O(1)–Cu(2)–N(7) <sup>#1</sup>                | 89.37(9)  |
| N(8) <sup>#2</sup> –Cu(2)–N(4) <sup>#3</sup> | 88.13(11)  | N(8) <sup>#2</sup> –Cu(2)–N(7) <sup>#1</sup> | 95.11(10) |
| O(5)–Cu(2)–N(7) <sup>#1</sup>                | 87.77(9)   | O(1)–Cu(2)–N(2)                              | 98.08(10) |
| N(4) <sup>#3</sup> –Cu(2)–N(7) <sup>#1</sup> | 87.12(10)  | N(8) <sup>#2</sup> –Cu(2)–N(2)               | 90.97(10) |
| O(5)–Cu(2)–N(2)                              | 86.45(9)   | N(4) <sup>#3</sup> –Cu(2)–N(2)               | 86.08(10) |
| N(5)–Cu(3)–O(5)                              | 90.32(10)  | N(1)–Cu(3)–O(2) <sup>#4</sup>                | 92.37(10) |
| N(5)–Cu(3)–O(2) <sup>#4</sup>                | 88.11(10)  | N(1)–Cu(3)–O(5)                              | 91.72(10) |
| N(1)–Cu(3)–O(2)                              | 103.01(10) | N(5)–Cu(3)–O(2)                              | 92.59(10) |
| O(2) <sup>#4</sup> –Cu(3)–O(2)               | 78.91(9)   | O(5)–Cu(3)–O(2)                              | 91.68(8)  |

<sup>a</sup> Symmetry codes: <sup>#1</sup> 1 – x, – y, 1 – z; <sup>#2</sup> x – 1, y, z; <sup>#3</sup> 1/2 – x, y – 1/2, 3/2 – z; <sup>#4</sup> 1 – x, 1 – y, 1 – z.

**Table S2** Selected bond lengths /Å and angles /° for **2**<sup>a</sup>

|                                               |            |                                               |            |
|-----------------------------------------------|------------|-----------------------------------------------|------------|
| Cu(1)–N(2)                                    | 2.022(3)   | Cu(1)–Cl(1)                                   | 2.6050(16) |
| Cu(2)–N(4) <sup>#4</sup>                      | 2.009(4)   | Cu(2)–N(1)                                    | 2.056(4)   |
| Cu(2)–Cl(1)                                   | 2.4743(16) |                                               |            |
| N(2) <sup>#1</sup> –Cu(1)–N(2)                | 87.6(2)    | N(2)–Cu(1)–N(2) <sup>#2</sup>                 | 92.4(2)    |
| N(2) <sup>#1</sup> –Cu(1)–N(2) <sup>#3</sup>  | 92.4(2)    | N(2) <sup>#2</sup> –Cu(1)–N(2) <sup>#3</sup>  | 87.6(2)    |
| N(2) <sup>#1</sup> –Cu(1)–Cl(1)               | 87.79(10)  | N(2)–Cu(1)–Cl(1)                              | 87.79(10)  |
| N(2) <sup>#2</sup> –Cu(1)–Cl(1)               | 92.21(10)  | N(2) <sup>#3</sup> –Cu(1)–Cl(1)               | 92.21(10)  |
| N(2) <sup>#1</sup> –Cu(1)–Cl(1) <sup>#3</sup> | 92.21(10)  | N(2)–Cu(1)–Cl(1) <sup>#3</sup>                | 92.21(10)  |
| N(2) <sup>#2</sup> –Cu(1)–Cl(1) <sup>#3</sup> | 87.79(10)  | N(2) <sup>#3</sup> –Cu(1)–Cl(1) <sup>#3</sup> | 87.79(10)  |
| N(4) <sup>#4</sup> –Cu(2)–N(4) <sup>#5</sup>  | 91.3(2)    | N(4) <sup>#4</sup> –Cu(2)–N(1)                | 89.68(15)  |
| N(4) <sup>#5</sup> –Cu(2)–N(1) <sup>#1</sup>  | 89.68(15)  | N(1)–Cu(2)–N(1) <sup>#1</sup>                 | 87.7(2)    |
| N(4) <sup>#4</sup> –Cu(2)–Cl(1)               | 96.72(10)  | N(4) <sup>#5</sup> –Cu(2)–Cl(1)               | 96.72(10)  |
| N(1)–Cu(2)–Cl(1)                              | 92.67(10)  | N(1) <sup>#1</sup> –Cu(2)–Cl(1)               | 92.67(10)  |

<sup>a</sup> Symmetry codes: <sup>#1</sup>  $x, y, 1 - z$ ; <sup>#2</sup>  $1 - x, 1 - y, z$ ; <sup>#3</sup>  $1 - x, 1 - y, 1 - z$ ; <sup>#4</sup>  $3/2 - x, y + 1/2, 1/2 - z$ ; <sup>#5</sup>  $3/2 - x,$

$y$  +  $1/2,$   $z$  +  $1/2.$

**Table S3** Selected bond lengths /Å and angles /° for **3**<sup>a</sup>

|                                              |           |                                              |           |
|----------------------------------------------|-----------|----------------------------------------------|-----------|
| Cu(1)–N(4) <sup>#1</sup>                     | 1.981(3)  | Cu(1)–N(3) <sup>#2</sup>                     | 1.986(3)  |
| Cu(1)–N(5)                                   | 1.991(3)  | Cu(1)–N(5) <sup>#3</sup>                     | 2.000(2)  |
| Cu(1)–N(1)                                   | 2.204(3)  |                                              |           |
| N(4) <sup>#1</sup> –Cu(1)–N(5)               | 86.53(11) | N(3) <sup>#2</sup> –Cu(1)–N(5)               | 93.10(11) |
| N(4) <sup>#1</sup> –Cu(1)–N(5) <sup>#3</sup> | 91.38(11) | N(3) <sup>#2</sup> –Cu(1)–N(5) <sup>#3</sup> | 86.07(10) |
| N(4) <sup>#1</sup> –Cu(1)–N(1)               | 99.92(11) | N(3) <sup>#2</sup> –Cu(1)–N(1)               | 93.13(11) |
| N(5)–Cu(1)–N(1)                              | 96.04(12) | N(5) <sup>#3</sup> –Cu(1)–N(1)               | 96.82(12) |

<sup>a</sup> Symmetry codes: <sup>#1</sup>  $1/2 - x, 1 - y, z - 1/2$ ; <sup>#2</sup>  $-x, y + 1/2, 1/2 - z$ ; <sup>#3</sup>  $x - 1/2, 3/2 - y, -z$ .

**Table S4** Selected bond lengths /Å and angles /° for **4**<sup>a</sup>

|                                              |          |                                              |          |
|----------------------------------------------|----------|----------------------------------------------|----------|
| Cu(1)–N(5) <sup>#1</sup>                     | 2.100(7) | Cu(2)–N(6)                                   | 2.096(7) |
| Cu(1)–N(7)                                   | 2.134(6) | Cu(2)–N(4)                                   | 2.120(6) |
| Cu(1)–N(3)                                   | 2.142(6) |                                              |          |
| N(5) <sup>#1</sup> –Cu(1)–N(7)               | 89.8(3)  | N(5) <sup>#2</sup> –Cu(1)–N(7)               | 90.2(3)  |
| N(5) <sup>#1</sup> –Cu(1)–N(7) <sup>#3</sup> | 90.2(3)  | N(5) <sup>#2</sup> –Cu(1)–N(7) <sup>#3</sup> | 89.8(3)  |
| N(5) <sup>#1</sup> –Cu(1)–N(3) <sup>#3</sup> | 89.8(2)  | N(5) <sup>#2</sup> –Cu(1)–N(3) <sup>#3</sup> | 90.2(2)  |
| N(7)–Cu(1)–N(3) <sup>#3</sup>                | 89.9(3)  | N(7) <sup>#3</sup> –Cu(1)–N(3) <sup>#3</sup> | 90.1(3)  |
| N(5) <sup>#1</sup> –Cu(1)–N(3)               | 90.2(2)  | N(5) <sup>#2</sup> –Cu(1)–N(3)               | 89.8(2)  |
| N(7)–Cu(1)–N(3)                              | 90.1(3)  | N(7) <sup>#3</sup> –Cu(1)–N(3)               | 89.9(3)  |
| N(6) <sup>#4</sup> –Cu(2)–N(6) <sup>#2</sup> | 88.4(3)  | N(6) <sup>#4</sup> –Cu(2)–N(6)               | 88.4(3)  |
| N(6) <sup>#2</sup> –Cu(2)–N(6)               | 88.4(3)  | N(6) <sup>#4</sup> –Cu(2)–N(4) <sup>#4</sup> | 90.5(2)  |
| N(6) <sup>#2</sup> –Cu(2)–N(4) <sup>#4</sup> | 90.0(3)  | N(6) <sup>#2</sup> –Cu(2)–N(4) <sup>#2</sup> | 90.5(3)  |
| N(6)–Cu(2)–N(4) <sup>#2</sup>                | 90.0(3)  | N(4) <sup>#4</sup> –Cu(2)–N(4) <sup>#2</sup> | 91.1(2)  |
| N(6) <sup>#4</sup> –Cu(2)–N(4)               | 90.0(3)  | N(6)–Cu(2)–N(4)                              | 90.5(3)  |
| N(4) <sup>#4</sup> –Cu(2)–N(4)               | 91.1(2)  | N(4) <sup>#2</sup> –Cu(2)–N(4)               | 91.1(2)  |

<sup>a</sup> Symmetry codes: <sup>#1</sup>  $x - y, x, 2 - z$ ; <sup>#2</sup>  $1 - x + y, 1 - x, z$ ; <sup>#3</sup>  $1 - x, 1 - y, 2 - z$ ; <sup>#4</sup>  $1 - y, x - y, z$ .

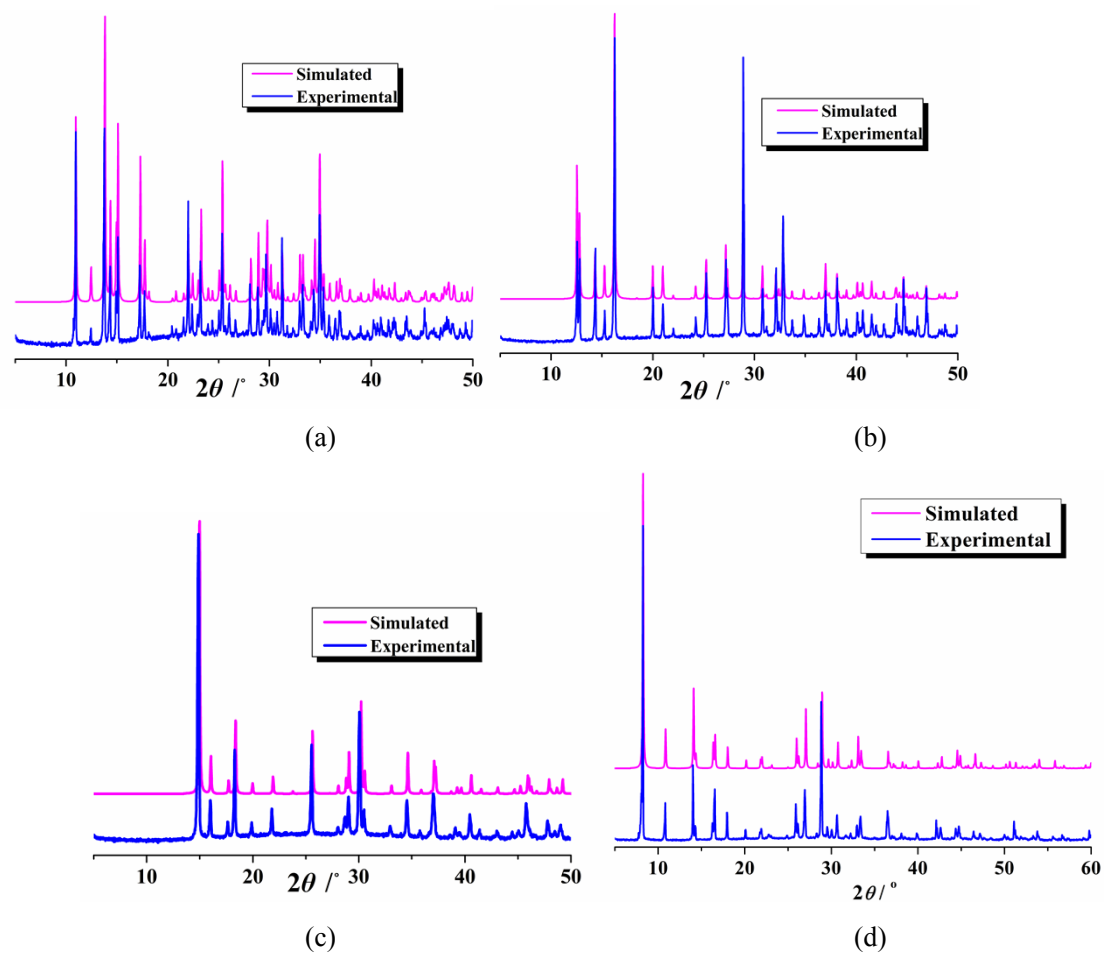

**Fig. S1.** Simulated (purple) and experimental (blue) PXRD patterns for **1** (a)–**4** (d).

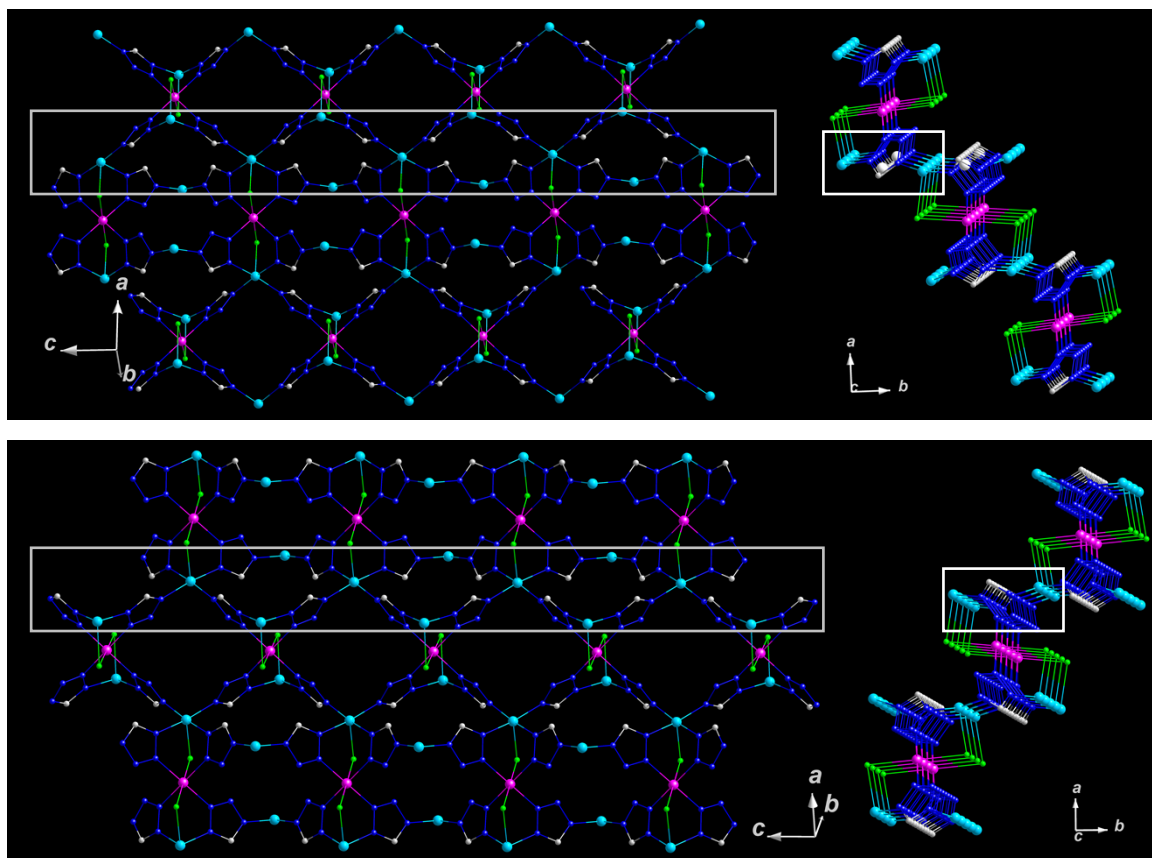

**Fig. S2.** The connection modes of  $tz^-$  ligand and  $Cu_2$  ion in the two different planes of **2**.

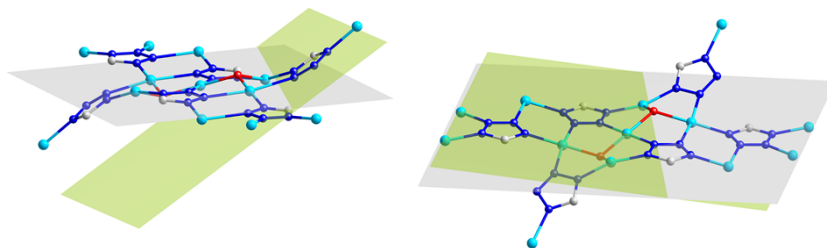

**Fig. S3.** The dihedral angles between the  $\text{Cu}^{\text{II}}_5$  plane and the  $\mu_3$ -/ $\mu_4$ - $\text{tz}^-$  planes in **1**.
